# Supplementary material for: The linker histone chaperone Prothymosin α (PTMA) is essential for efficient DNA damage repair and the recruitment of PARP1.
Source: Research Square preprint supplement (doi:10.21203/rs.3.rs-5500244/v1), 2025-04-30
Supplement: Supplementary file 1 [file ddcab361e534002b699dc563.docx]

**Supplemental Materials for**

The linker histone chaperone Prothymosin α (PTMA) is essential for efficient DNA damage repair and the recruitment of PARP1.

Ciara A. McKnight1, Mary E. Graichen1, Eric M. George2 and David T. Brown1,3

1 Department of Cell and Molecular Biology, University of Mississippi School of Medicine, Jackson MS 39216

2 Department of Physiology and Biophysics, University of Mississippi School of Medicine, Jackson MS 39216

3 Corresponding author

**Supplemental Table 1. Plasmids used in this study**

**CMVPARP1-GFPhyg**

**Purpose** – Expression, in cultured mammalian cells, of a chimeric protein consisting of the enhanced Green Fluorescent Protein fused to the C-terminus of human PARP1.

**Features**: AmpR – ampicillin-resistance for bacterial selection; HygR – hygromycin B- resistance gene for selection in mammalian cells, CMV – human immediate early enhancer/promoter for constitutive expression; PARP1-GFP – coding sequence for chimeric protein.

**PARP1-GFP sequence – PARP1 residues, GFP residues**

MAESSDKLYRVEYAKSGRASCKKCSESIPKDSLRMAIMVQSPMFDGKVPHWYHFSCFWKVGHSIRHPDVEVDGFSELRWDDQQKVKKTAEAGGVTGKGQDGIGSKAEKTLGDFAAEYAKSNRSTCKGCMEKIEKGQVRLSKKMVDPEKPQLGMIDRWYHPGCFVKNREELGFRPEYSASQLKGFSLLATEDKEALKKQLPGVKSEGKRKGDEVDGVDEVAKKKSKKEKDKDSKLEKALKAQNDLIWNIKDELKKVCSTNDLKELLIFNKQQVPSGESAILDRVADGMVFGALLPCEECSGQLVFKSDAYYCTGDVTAWTKCMVKTQTPNRKEWVTPKEFREISYLKKLKVKKQDRIFPPETSASVAATPPPSTASAPAAVNSSASADKPLSNMKILTLGKLSRNKDEVKAMIEKLGGKLTGTANKASLCISTKKEVEKMNKKMEEVKEANIRVVSEDFLQDVSASTKSLQELFLAHILSPWGAEVKAEPVEVVAPRGKSGAALSKKSKGQVKEEGINKSEKRMKLTLKGGAAVDPDSGLEHSAHVLEKGGKVFSATLGLVDIVKGTNSYYKLQLLEDDKENRYWIFRSWGRVGTVIGSNKLEQMPSKEDAIEHFMKLYEEKTGNAWHSKNFTKYPKKFYPLEIDYGQDEEAVKKLTVNPGTKSKLPKPVQDLIKMIFDVESMKKAMVEYEIDLQKMPLGKLSKRQIQAAYSILSEVQQAVSQGSSDSQILDLSNRFYTLIPHDFGMKKPPLLNNADSVQAKVEMLDNLLDIEVAYSLLRGGSDDSSKDPIDVNYEKLKTDIKVVDRDSEEAEIIRKYVKNTHATTHNAYDLEVIDIFKIEREGECQRYKPFKQLHNRRLLWHGSRTTNFAGILSQGLRIAPPEAPVTGYMFGKGIYFADMVSKSANYCHTSQGDPIGLILLGEVALGNMYELKHASHISKLPKGKHSVKGLGKTTPDPSANISLDGVDVPLGTGISSGVNDTSLLYNEYIVYDIAQVNLKYLLKLKFNFKTSLWGSGSGGPGSIATMVSKGEELFTGVVPILVELDGDVNGHKFSVSGEGEGDATYGKLTLKFICTTGKLPVPWPTLVTTLTYGVQCFSRYPDHMKQHDFFKSAMPEGYVQERTIFFKDDGNYKTRAEVKFEGDTLVNRIELKGIDFKEDGNILGHKLEYNYNSHNVYIMADKQKNGIKVNFKIRHNIEDGSVQLADHYQQNTPIGDGPVLLPDNHYLSTQSALSKDPNEKRDHMVLLEFVTAAGITLGMDELYK


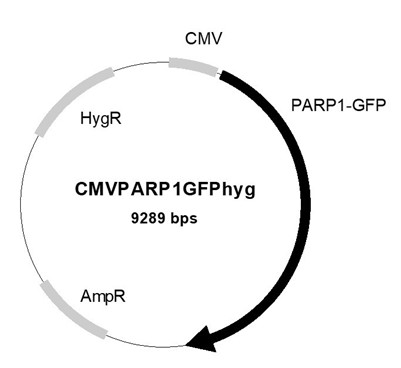


**CMVGFP-XRCC1hyg**

**Purpose** – Expression, in cultured mammalian cells, of a chimeric protein consisting of the enhanced Green Fluorescent Protein fused to the N-terminus of human XRCC1.

**Features**: AmpR – ampicillin-resistance for bacterial selection; HygR – hygromycin B- resistance gene for selection in mammalian cells, CMV – human immediate early enhancer/promoter for constitutive expression; PARP1-GFP – coding sequence for chimeric protein.

**GFP-XRCC1 sequence – GFP residues, XRCC1 residues**

MVSKGEELFTGVVPILVELDGDVNGHKFSVSGEGEGDATYGKLTLKFICTTGKLPVPWPTLVTTLTYGVQCFSRYPDHMKQHDFFKSAMPEGYVQERTIFFKDDGNYKTRAEVKFEGDTLVNRIELKGIDFKEDGNILGHKLEYNYNSHNVYIMADKQKNGIKVNFKIRHNIEDGSVQLADHYQQNTPIGDGPVLLPDNHYLSTQSALSKDPNEKRDHMVLLEFVTAAGITLGMDELYKSGLRSASNSAVDTMVLDPEIRLRHVVSCSSQDSTHCAENLLKADTYRKWRAAKAGEKTISVVLQLEKEEQIHSVDIGNDGSAFVEVLAGSSAGGAGEQDYEVLLVTSSFMSPSESRSGSNPNRVRMFGPDKLVRAAAEKRWDRVKIVCSQPYSKDSPFGLS

FVRFHSPPDKDEAEAPSQKVTVTKLGQFRVKEEDESANSLRPGALFFSRINKTSPVTASDPAGPSYAAATLQASSAASSSPVSRAIGSTSKPQESPKGKRKLDLNQEEKKTPSKPPAQLSPSVPKRPKLPAPTRTPATAPVPARAQGAVTGKPRGEGTEPRRPRAGPEELGKILQGVVVVLSGFQNPFRSELRDKALELGAKYRPDWTRDSTHLICAFANTPKYSQVLGLGGRIVRKEWVLDCHRMRRRLPSQRYLMAGPGSSSEEDEASHSGGSGDEAPKLPQKQPQTKTKPTQAAGPSSPQKPPTPEETKAASPVLQEDIDIEGVQSEGQDNGAEDSGDTEDELRRVAEQKEHRLPPGQEENGEDPYAGSTDENTDSEEHQEPPDLPVPELPDFFQG

KHFFLYGEFPGDERRKLIRYVTAFNGELEDYMSDRVQFVITAQEWDPSFEEALMDNPSLAFVRPRWIYSCNEKQKLLPHQLYGVVPQAEFCGRDPPDLDN


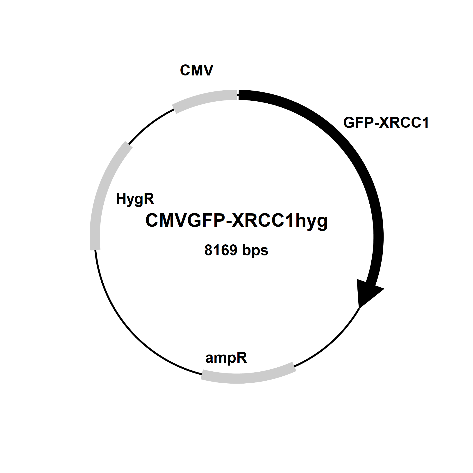


**CMVH1.0-GFPpur**

**Purpose** – Expression, in cultured mammalian cells, of a chimeric protein consisting of the Enhanced Green Fluorescent Protein fused to the C-terminus of mouse H1.0.

**Features:** AmpR – ampicillin-resistance for bacterial selection; PurR- puromycin resistance gene for selection in mammalian cells, CMV – human immediate early enhancer/promoter for constitutive expression; H1.0-GFP – coding sequence for chimeric protein.

**H1.0-GFP sequence** – H1.0 residues, GFP residues

MTENSTSAPAAKPKRAKASKKSTDHPKYSDMIVAAIQAEKNRAGSSRQSIQKYIKSHYKVGENADSQIKLSIKRLVTTGVLKQTKGVGASGSFRLAKGDEPKRSVAFKKTKKEVKKVATPKKAAKPKKAASKAPSKKPKATPVKKAKKKPAATPKKAKKPKVVKVKPVKASKPKKAKTVKPKAKSSAKRGSKKKAMVSKGEELFTGVVPILVELDGDVNGHKFSVSGEGEGDATYGKLTLKFICTTGKLPVPWPTLVTTLTYGVQCFSRYPDHMKQHDFFKSAMPEGYVQERTIFFKDDGNYKTRAEVKFEGDTLVNRIELKGIDFKEDGNILGHKLEYNYNSHNVYIMADKQKNGIKVNFKIRHNIEDGSVQLADHYQQNTPIGDGPVLLPDNHYLSTQSALSKDPNEKRDHMVLLEFVTAAGITLGMDELYK


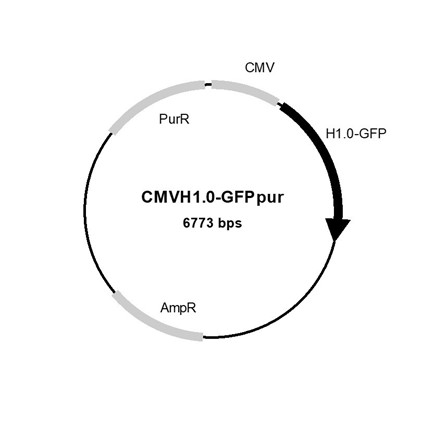


**CMVOr-H1.0pur**

**Purpose** – Expression, in cultured mammalian cells, of a chimeric protein consisting of the SMOrange Fluorescent Protein fused to the N-terminus of mouse H1.0.

**Features**: AmpR – ampicillin-resistance for bacterial selection; PurR- puromycin resistance gene for selection in mammalian cells, CMV – human immediate early enhancer/promoter for constitutive expression; Or-H1.0 – coding sequence for chimeric protein.

**Or-H1.0sequence** – Or residues, Linker, H1.0 residues

MVSKGEENNMAIIKEFMRFKVRMEGTVNGHEFEIEGEGEGRPYEGFQTAKLKVTKGGPLPFAWDILSPLFTYGSKAYVKHPADIPDYFKLSFPEGFKWERVMNYEDGGVVTVTQDSSLQDGEFIYKVKMRGTNFPSDGPVMQKKTMGWEASSERMYPEDGALKGEIRMRLKLKDGGHYTSEVKTTYKAKKSVQLPGAYIVGIKLDITSHNEDYTIVEQYERAEGRHSTGGMDELYKGGGGSGGGGSMATENSTSAPAAKPKRAKASKKSTDHPKYSDMIVAAIQAEKNRAGSSRQSIQKYIKSHYKVGENADSQIKLSIKRLVTTGVLKQTKGVGASGSFRLAKGDEPKRSVAFKKTKKEVKKVATPKKAAKPKKAASKAPSKKPKATPVKKAKKKPAATPKKAKKPKVVKVKPVKASKPKKAKTVKPKAKSSAKRASKKK


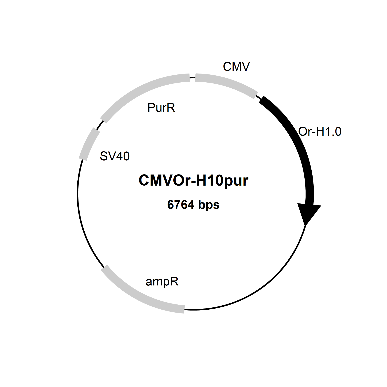


**CMVOr-H1.0Cduppur**

**Purpose** – Expression, in cultured mammalian cells, of a chimeric protein consisting of the SMOrange Fluorescent Protein fused to the N-terminus of mouse H1.0Cdup.

**Features**: AmpR – ampicillin-resistance for bacterial selection; PurR- puromycin resistance gene for selection in mammalian cells, CMV – human immediate early enhancer/promoter for constitutive expression; Or-H1.0Cdup – coding sequence for chimeric protein.

**Or-H1.0Cdup sequence** – Or residues, Linker, H1.0Cdup residues

MVSKGEENNMAIIKEFMRFKVRMEGTVNGHEFEIEGEGEGRPYEGFQTAKLKVTKGGPLPFAWDILSPLFTYGSKAYVK

HPADIPDYFKLSFPEGFKWERVMNYEDGGVVTVTQDSSLQDGEFIYKVKMRGTNFPSDGPVMQKKTMGWEASSERMYPE

DGALKGEIRMRLKLKDGGHYTSEVKTTYKAKKSVQLPGAYIVGIKLDITSHNEDYTIVEQYERAEGRHSTGGMDELYKG

GGGSGGGGSMATENSTSAPAAKPKRAKASKKSTDHPKYSDMIVAAIQAEKNRAGSSRQSIQKYIKSHYKVGENADSQIKLSIKRLVTTGVLKQTKGVGASGSFRLAKGDEPKRSVAFKKTKKEVKKVATPKKAAKPKKAASKAPSKKPKATPVKKAKKKPAATPKKAKKPKVVKVKPVKASKPKKAKTVKPKAKSSAKRASKKSKKKPAATPKKAKKPKVVKVKPVKASKPKKAKTVKPKAKSSAKRASKKK


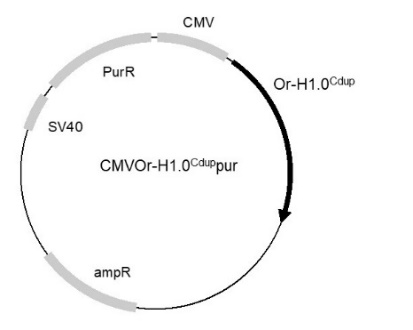


**MTH1.0Cduppur**

**Purpose** – Expression, in cultured mammalian cells, of H1.0Cdup.

**Features**: AmpR – ampicillin-resistance for bacterial selection; PurR- puromycin resistance gene for selection in mammalian cells, MT-mouse metallothionein promoter for inducible expression; H1.0Cdup – coding sequence for H1.0Cdup.

**H1.0Cdup sequence**

MATENSTSAPAAKPKRAKASKKSTDHPKYSDMIVAAIQAEKNRAGSSRQSIQKYIKSHYKVGENADSQIKLSIKRLVTTGVLKQTKGVGASGSFRLAKGDEPKRSVAFKKTKKEVKKVATPKKAAKPKKAASKAPSKKPKATPVKKAKKKPAATPKKAKKPKVVKVKPVKASKPKKAKTVKPKAKSSAKRASKKSKKKPAATPKKAKKPKVVKVKPVKASKPKKAKTVKPKAKSSAKRASKKK


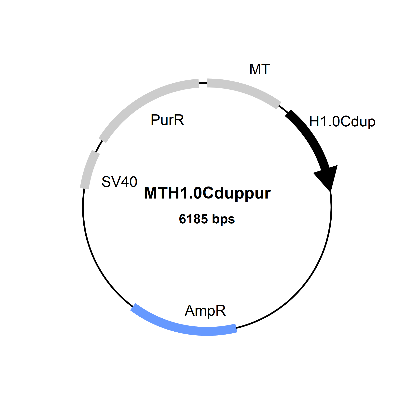


**CMVPTMASNhyg**

**Purpose** – Low level expression, in cultured mammalian cells, of a chimeric protein consisting of the SuperNova protein fused to the C-terminus of Mouse PTMA.

**Features**: AmpR – ampicillin-resistance for bacterial selection; HygR – hygromycin B- resistance gene for selection in mammalian cells, CMV – human immediate early enhancer/promoter for constitutive expression; PTMASN – coding sequence for chimeric protein.

**PTMASN sequence – PTMA residues, 3Xmyc tag, Supernova residues**

MSDAAVDTSSEITTKDLKEKKEVVEEAENGRDAPANGNAQNEENGEQEADNEVDEEEEEGGEEEEEEEEGDGEEEDGDEDEEAEAPTGKRVAEDDEDDDVDTKKQKTEEDDEQKLISEEDLEQKLISEEDLEQKLISEEDPTMGSEVGPALFQSDMTFKIFIDGEVNGQKFTIVADGSSKFPHGDFNVHAVCETGKLPMSWKPICHLIQYGEPFFARYPDGISHFAQECFPEGLSIDRTVRFENDGTMTSHHTYELDDTCVVSRITVNCDGFQPDGPIMRDQLVDILPSETHMFPHGPNAVRQTATIGFTTADGGKMMGHFDSKMTFNGSRAIEIPGPHFVTIITKQTRDTSDKRDHVCQREVAYAHSVPRITSAIGSDEDLYK


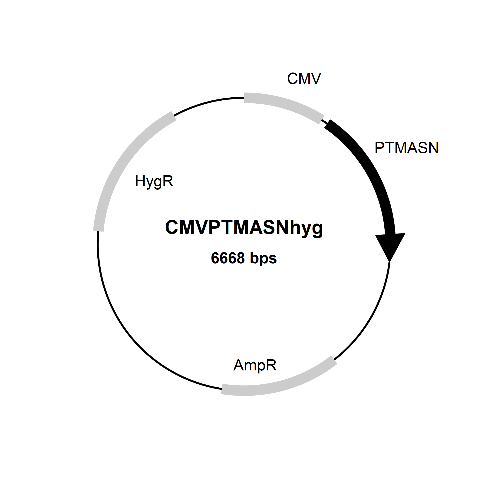


**MTPTMAmycpur**

**Purpose** – Inducible expression, in cultured mammalian cells, of myc-tagged wild type PTMA.

**Features**: AmpR – ampicillin-resistance for bacterial selection; PurR- puromycin resistance gene for selection in mammalian cells, MT-mouse metallothionein promoter for inducible expression; PTMAmyc – coding sequence for PTMAmyc.

**PTMAmycsequence** PTMA, 3Xmyctag

MSDAAVDTSSEITTKDLKEKKEVVEEAENGRDAPANGNAQNEENGEQEADNEVDEEEEEGGEEEEEEEEGDGEEEDGDEDEEAEAPTGKRVAEDDEDDDVDTKKQKTEEDDEQKLISEEDLEQKLISEEDLEQKLISEEDL


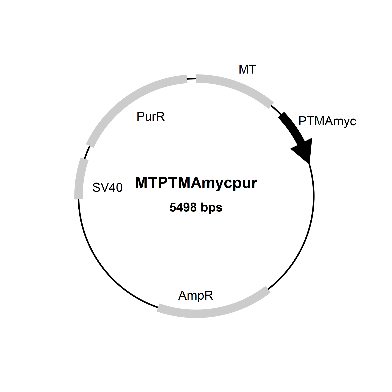


**MTPTMAmutpur**

**Purpose** – Inducible expression, in cultured mammalian cells, of myc-tagged mutant PTMA.

**Features**: AmpR – ampicillin-resistance for bacterial selection; PurR- puromycin resistance gene for selection in mammalian cells, MT-mouse metallothionein promoter for inducible expression; PTMAmyc – coding sequence for PTMAmutmyc.

**PTMAmutmycsequence** PTMAmut, 3Xmyctag

MSKDLKEKKEVVEEAENGRDAPANGNAQNEENGEQEADNEVDEEEEEGGEEEEEEEEGDGEEEDGDEDEEAEAPTGKRVAEDDEDDDVDTKKQKTEEDDEQKLISEEDLEQKLISEEDLEQKLISEEDL


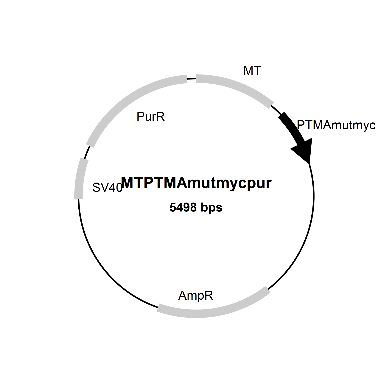


**Parp1CrX1-1**

**Purpose** – Expression, in cultured mammalian cells, of a gRNA directed to exon 1 of the mouse *Parp1* gene.

**Features**: U6 Pro – U6 promoter, gRNA/tracRNA coding region for gRNA/tracRNA, CMV – human immediate early enhancer/promoter for constitutive expression, CAS9 – coding region for Cas9 nuclease, AmpR – ampicillin-resistance for bacterial selection

**gRNA/tracRNA sequence gRNA, tracRNA**

CTCGGAGAGGCTTTATCGAGGTTTTAGAGCTAGAAATAGCAAGTTAAAATAAGGCTAGTCCGTTATCAACTTGAAAAAGTGGCACCGAGTCGGTGCTTT


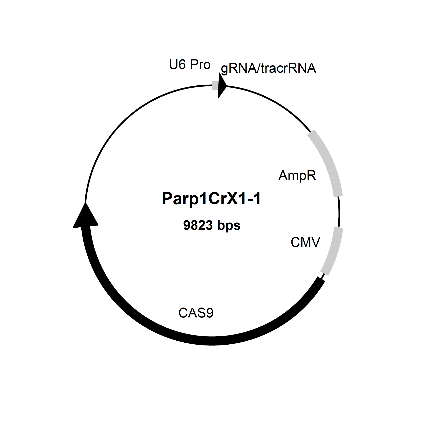


**Parp1CrX1-2**

**Purpose** – Expression, in cultured mammalian cells, of a gRNA directed to exon 1 of the mouse *Parp1* gene.

**Features**: U6 Pro – U6 promoter, gRNA/tracRNA coding region for gRNA/tracRNA, CMV – human immediate early enhancer/promoter for constitutive expression, CAS9 – coding region for Cas9 nuclease, AmpR – ampicillin-resistance for bacterial selection

**gRNA/tracRNA sequence gRNA, tracRNA**

TCCCAAGGACTCCCTCCGCAGTTTTAGAGCTAGAAATAGCAAGTTAAAATAAGGCTAGTCCGTTATCAACTTGAAAAAGTGGCACCGAGTCGGTGCTTT


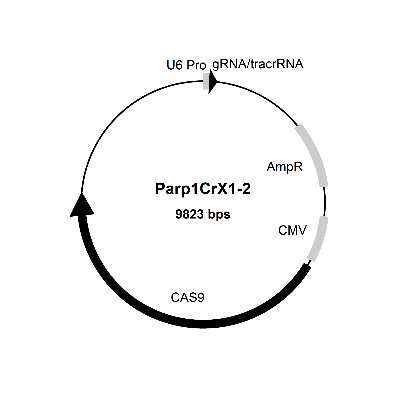


**PtmaCrX2-1**

**Purpose** – Expression, in cultured mammalian cells, of a gRNA directed to the intron/exon1 junction of the mouse *Ptma* gene.

**Features**: U6 Pro – U6 promoter, gRNA/tracRNA coding region for gRNA/tracRNA, CMV – human immediate early enhancer/promoter for constitutive expression, CAS9 – coding region for Cas9 nuclease, AmpR – ampicillin-resistance for bacterial selection

**gRNA/tracRNA sequence gRNA, tracRNA**

CTTCCTTCTAAAGGACTTGAGTTTTAGAGCTAGAAATAGCAAGTTAAAATAAGGCTAGTCCGTTATCAACTTGAAAAAGTGGCACCGAGTCGGTGCTTT


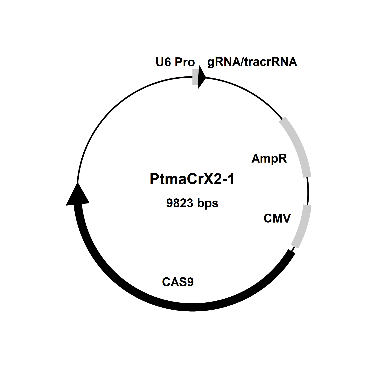


**Hpf1CrX2-1**

**Purpose** – Expression, in cultured mammalian cells, of a gRNA directed to exon 2 junction of the mouse *Hpf1a* gene.

**Features**: U6 Pro – U6 promoter, gRNA/tracRNA coding region for gRNA/tracRNA, CMV – human immediate early enhancer/promoter for constitutive expression, CAS9 – coding region for Cas9 nuclease, AmpR – ampicillin-resistance for bacterial selection

**gRNA/tracRNA sequence gRNA, tracRNA**

GAAGAAGAGTAAGTTTTCTGGTTTTAGAGCTAGAAATAGCAAGTTAAAATAAGGCTAGTCCGTTATCAACTTGAAAAAGTGGCACCGAGTCGGTGCTTT


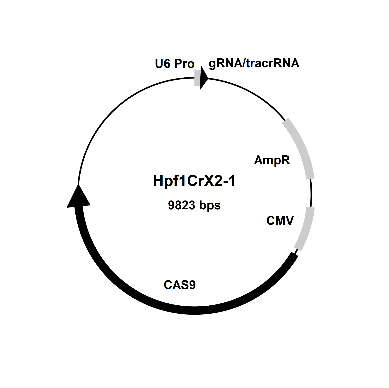


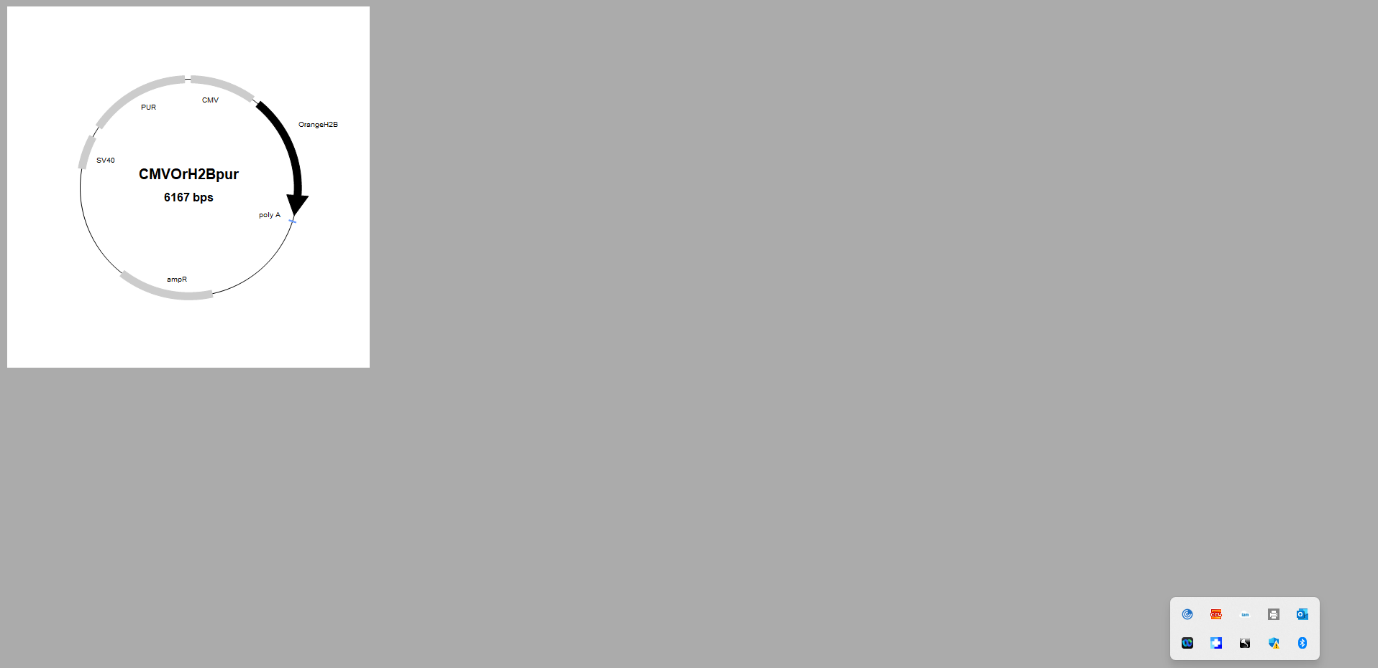


**CMVOr-H2Bpur**

**Purpose** – Expression, in cultured mammalian cells, of a chimeric protein consisting of the SMOrange Fluorescent Protein fused to the N-terminus of mouse H12B.

**Features**: AmpR – ampicillin-resistance for bacterial selection; PurR- puromycin resistance gene for selection in mammalian cells, CMV – human immediate early enhancer/promoter for constitutive expression; Or-H2B – coding sequence for chimeric protein.

**Or-H2B sequence** – Or residues, Linker, H12B residues

MVSKGEENNMAIIKEFMRFKVRMEGTVNGHEFEIEGEGEGRPYEGFQTAKLKVTKGGPLPFAWDILSPLFTYGSKAYVKHPADIPDYFKLSFPEGFKWERVMNYEDGGVVTVTQDSSLQDGEFIYKVKMRGTNFPSDGPVMQKKTMGWEASSERMYPEDGALKGEIRMRLKLKDGGHYTSEVKTTYKAKKSVQLPGAYIVGIKLDITSHNEDYTIVEQYERAEGRHSTGGMDELYKGGGGSGGGGSMA**PEPAKSAPAPKKGSKKAVTKAQKKGGKKRKRSRKESYSIYVYKVLKQVHPDTGISSKAMGIMNSFVNDIFERIAGEASRLAHYNKRSTITSREIQTAVRLLLPGELAKHAVSEGTKAITKYTSAK**

**Supplemental Table 2. Oligos used in this study.**

| **Name** | **Sequence** |
| --- | --- |
| Parp1CrX1-1t | 5’CTCGGAGAGGCTTTATCGAGGTTTT |
| Parp1CrX1-1b | 5’CTCGATAAAGCCTCTCCGAGCGGTG |
| Parp1CrX1-2t | 5’GCCATGCGGAGGGAGTCCTTGTTTT |
| Parp1CrX1-2b | 5’AAGGACTCCCTCCGCATGGCCGGTG |
| Parp1X1PCRf | 5’AGGGTTCGCTCTAGACATAC |
| Parp1X1PCRr | 5’CAAGACCGAGGGAATAATGG |
| Parp1X1seqf | 5’CCCAAGGACACGTGCTGAAG |
| Parp1X1seqr | 5’CTTGCAGGGTAAGCGCAATG |
| PtmaCrX2-1t | 5’ CTTCCTTCTAAAGGACTTGAGTTTT |
| PtmaCrX2-1b | 5’ TCAAGTCCTTTAGAAGGAAGCGGTG |
| PtmaX2PCRf | 5’ GGTCCATGCTGACATTACC |
| PtmaX2PCRr | 5’ GGCCGTGACTACACTAAG |
| PtmaX2seqf | 5’ GTAGCCAGTGACTCAGATTG |
| PtmaX2seqr | 5’ GCCTGTGACTACACATAAGC |
| Hpf1CrX2t | 5’ GAAGAAGAGTAAGTTTTCTGGTTTT |
| Hpf1CrX2b | 5’ CAGAAAACTTACTCTTCTTCCGGTG |
| HpfX2PCRf | 5’ GATGTGATGGCATCTTGG |
| HpfX2PCRr | 5’ CCATGCACTTACCTTACC |
| HPfSeqf1 | 5’ CCACCGTGTAAACTGTGTTC |
| HPfSeqr1 | 5’ CCCAGCAATGAAGTTGAC |

**A.**

ATGGCGGAGGC**CTCGGAGAGGCTTTATCGAG**TGGAGTACGCGAAGAGCGGGCGCGCCTCT

M A E A S E R L Y R V E Y A K S G R A S 20

TGCAAGAAATGCAGCGAGAGTATTCCC**AAGGACTCCCTCCGCATGGC**CATCATGGTGCAG

C K K C S E S I P K D S L R M A I M V Q 40


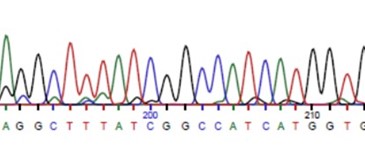

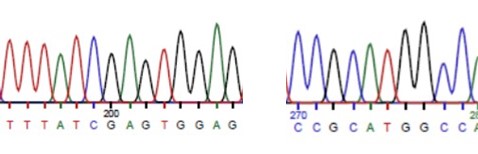


WT MAEASERLYRVEYAKSGRASCKKCSESIPKDSLRMAIMVQSPMFD45

GKVPHWYHFSCFWKVGHSIRQPDVEVDGFSELRWDDQQKVKKTAE90

*Parp1-/-* MAEASERLYRPSWCSHPCSMGKSHTGTTSPASGRWATPSGSLMLR45

WMASLSCAGMISRRSRRRPRLEAWQAKARMEVAARRRRHWVTF88

**Supplemental Figure 1.** Isolation of a *Parp1-/-* cell line. **A.** Partial sequence of Exon 1 of the mouse *Parp1* gene. Underlined sequences are the targets for gRNAs generated by plasmids constructed by annealing oligos Parp1CrX1-1t/Parp1CrX-1b and Parp1CrX1-2t/Parp1CrXb-2b and cloning into the vector from the GeneArt®CRISPR Nuclease CD4 Enrichment kit to generate plasmids Parp1CrX1-1 and Parp1CrX1-2 (see above). These plasmids were simultaneously transfected into cells using Lipofectamine 3000 (Invitrogen) and plated at low density without selection. Approximately 50 independent colonies were subcloned. Genomic DNA was isolated from each and a DNA fragment encompassing Exon1 of the Parp1 gene was generated by PCR with oligos Parp1X1PCRf and Parp1X1PCRf and sequenced with primers Parp1X1seqf and Parp1X1seqf. **B.** One isolate was found to contain a homozygous 76 base pair deletion spanning codons 10-35. **C.** Translation of mRNA containing this deletion would be expected to yield a 88 aa peptide with only the first 10 aa identical to PARP1.

**B.**

**WT**

***Parp1-/-***

**C.**

**Supplemental Figure 2.** Isolation of a *Hpf1-/-* cell line. **A.** Partial sequence of Exon 2 of the mouse *Hpf1* gene. Underlined sequences are the target for a gRNA generated by plasmids constructed by annealing oligos Hpf1CrX2t/ Hpf1CrX2b and cloning into the vector from the GeneArt®CRISPR Nuclease CD4 Enrichment kit to generate plasmid Hpf1CrX1-1.This plasmid was transfected into cells using Lipofectamine 3000 (Invitrogen) and plated at low density without selection. Approximately 50 independent colonies were subcloned. Genomic DNA was isolated from each and a DNA fragment encompassing Exon2 of the *Hpf1* gene was generated by PCR with oligos HpfX2PCRf and HpfX2PCRr and sequenced with primers Hpf1seqf1 and Hpf1seqf2.. **B.** One isolate was found to contain an insertion of a single T residue in codon 27. **C.** First 40 of 370 aa of WT HPF1. Translation of mRNA containing this deletion would be expected to yield a 28 aa peptide with only the first 27 aa identical to HPF1. **D**. Plasmid CMVOr-H1.0pur was stably transfected into the a *Hpf1-/-* cell line. cells were microirradiated with either the 488-nm laser to photoconvert the Or-H1.0 or simultaneously with the 488-nm and 405-nm lasers to photoconvert Or-H1.0 and damage DNA. **D.** Time course of release of Or-H1.0**. E.** Quantitation of the time for loss of 50% of the initial fluorescence (t50) from undamaged (U) and damaged (D) regions (✱✱✱✱, unpaired student’s t-test, p-value<0.0001, **ns**, not significant,N=18).

GAAAAGACAGTTGAGGT**GAAGAAGAGTAAGTTTTCTG**AGGCTGATGTCTCC

E K T V E V K K S K F S E A D V S

*Hpf1-/-*

WT

*

**A**

**B**

WT MVGGGGKRRTAGAGPQCEKTVEVKKSKFSEADVSSDLRKE

*Hpf1-/-* MVGGGGKRRTAGAGPQCEKTVEVKKSKFF

**C**


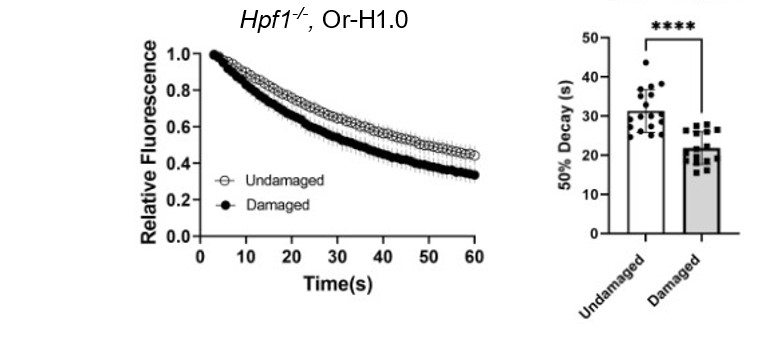


**E**

**D**


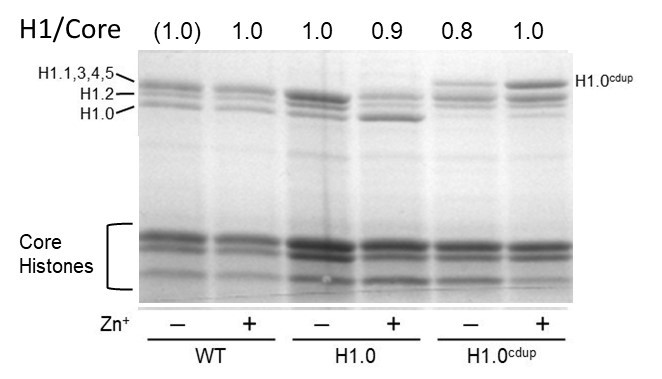


**Supplemental Figure 3.** Overexpression of individual H1 variants does not significantly alter the amount of total H1. Total histones were prepared from wild type cells and cells overexpressing H1.0 or H1.0cdup and separated on polyacrylamide gels. As we previously noted (69) overexpression of individual H1 variants results in a compensatory reduction in the expression of other variants such that the total amount of H1 relative to core histones is not significantly altered.

**Supplemental Figure 4.** Isolation of a *Ptma-/-* cell line. Wild type cells were stably transfected with plasmid CMVPTMASNhyg which expresses PTMA fused to a fluorescent protein to generate the cell line PTMA-SN. **A**. Western blot analysis revealed that the tagged protein (✱✱) was expressed at <5% the level of the endogenous protein (✱). **B.** Partial sequence of the junction between Intron 1 (unbolded) and Exon 2 (bolded) of the mouse *Ptma* gene. Underlined sequences are the target for a gRNA generated by plasmids constructed by annealing oligos PtmaCrX2-1t and PtmaCrX2-1t and cloning into the vector from the GeneArt®CRISPR Nuclease CD4 Enrichment kit to generate plasmid PtmaCrX2-1. This plasmid was transfected into cell line PTMA-SN. Approximately 50 independent colonies were subcloned. Genomic DNA was isolated from each and a DNA fragment encompassing Intron 1 and Exon2 of the *Ptma* gene was generated by PCR with oligos PtmaX2PCRf and PtmaX2PCRf and sequenced with primers Ptmaseqf1 and Ptmaseqf2. **C.** One isolate was found to contain an insertion of a single T residue in codon 17. **D.** Translation of mRNA containing this deletion would be expected to yield a 41 aa peptide with only the first 16 aa identical to Hpf1. Western blotting showed that no endogenous PTMA was expressed (**A, lane 2**).

.


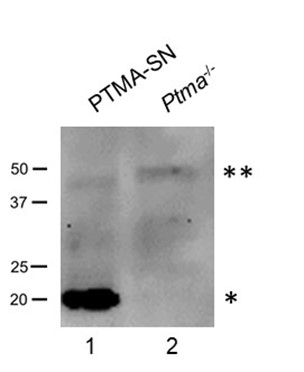


TTTCCTCTTCCTTCTAAAGG**ACTTGAAGGAGAAGAAGGAAGTT**

16 D L K E K K E V 24


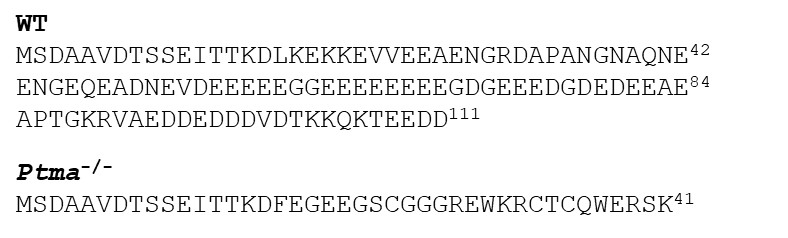


**A**

**B**

**C**

**D**

*


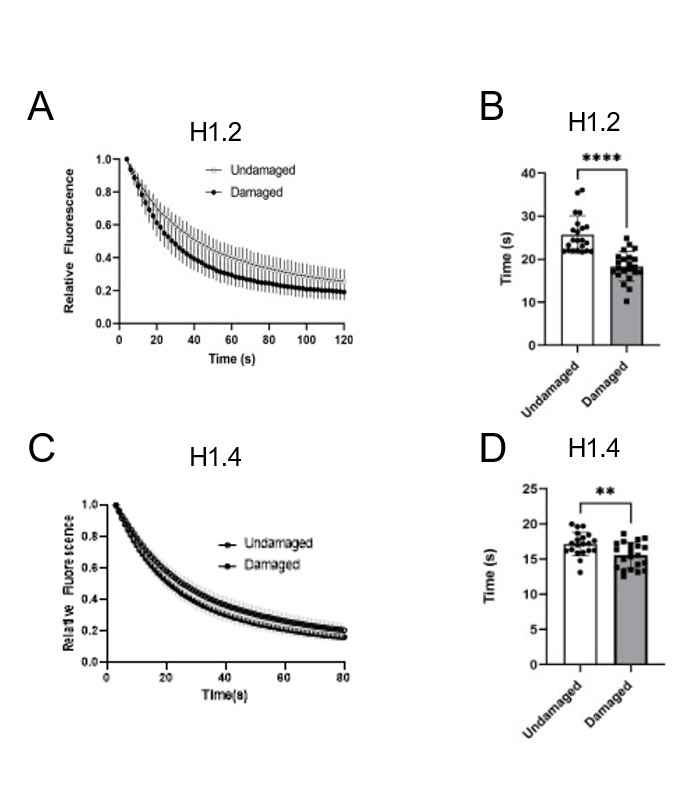


**Supplemental Figure 5. H1.2 and H1.4 demonstrate acceleraed release from damaged DNA. A**. Fluorescence tracings of Or-H1.2 from undamaged (488 nm) and damaged (405 nm + 488 nm) regions (n=22). **B.** Non-linear regression model determining the time it took to lose 50% of the fluorescence from the undamaged and damaged regions (n=22, student’s unpaired t-test, p-value<0.0001). **C.** Fluorescence tracings of Or-H1.2 from undamaged (488 nm) vs. damaged (405 nm + 488 nm) regions (n=20, 21). **D.** Non-linear regression model determining the time it took to lose 50% of the fluorescence from the undamaged and damaged regions (n=20, 21, nonpaired student’s t-test, p-value<0.01).


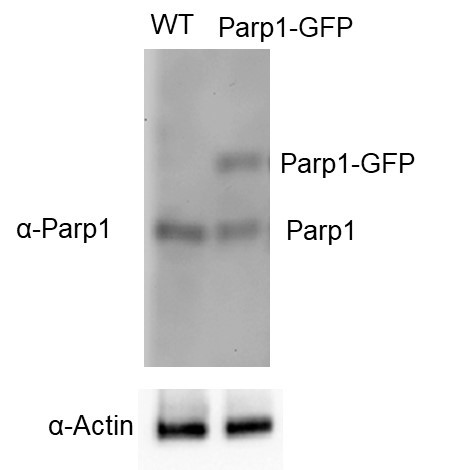


**Supplemental Figure 6.** Transfection of a plasmid expressing Parp1-GFP does not significantly alter the amount of total Parp1 (endogenous plus exogenous). Total cell extracts were prepared from wild type cells and cells stably transfected with CMVParp1-GFPpur. Western blots were performed using α-Parp1 antibody and α-myc antibody (loading control). Expression of Parp1-GFP results in reduced expression of the endogenous gene such that the total amount of Parp1 is not significantly altered. Furthermore, we image cells expressing the lowest amount of tagged protein that results in an acceptable signal-to-noise ratio.
